# Supplementary material for: Prevalence, Clinico-Bacteriological Profile, and Antibiotic Resistance of Symptomatic Urinary Tract Infections in Pregnant Women
Source: MDPI journal article supplement (doi:10.3390/antibiotics12010033), 2022-12-25
Supplement: s1 [file s1]

## UTI Symptoms Questionnaire

|                                                                                                     |                                                                                                                                                    |                                   |                                |                                |                                   |
|-----------------------------------------------------------------------------------------------------|----------------------------------------------------------------------------------------------------------------------------------------------------|-----------------------------------|--------------------------------|--------------------------------|-----------------------------------|
| 1                                                                                                   | In the past 7 days did you experience any one or more of the following symptoms?                                                                   |                                   |                                |                                |                                   |
| Please choose (✓) more than 1 of the symptoms if applicable but 1 score for each of them if present |                                                                                                                                                    | Did not have [0]                  | Mild [1]                       | Moderate [2]                   | Severe [3]                        |
| a.                                                                                                  | Frequency of urination (going to the toilet very often)?                                                                                           | (4 times or less/day)             | (5-6 times/day)                | (7-8 times/day)                | (9 times or more/day)             |
| b.                                                                                                  | Urgency (A strong desire to pass urine that you cannot control)                                                                                    |                                   |                                |                                |                                   |
| c.                                                                                                  | Burning during the passing of urine                                                                                                                |                                   |                                |                                |                                   |
| d.                                                                                                  | Pain during the passing of urine                                                                                                                   |                                   |                                |                                |                                   |
| e.                                                                                                  | Passage of blood in the urine                                                                                                                      |                                   |                                |                                |                                   |
| f.                                                                                                  | Feeling that the amount of urine is less and you have passed the urine incompletely                                                                |                                   |                                |                                |                                   |
| g.                                                                                                  | Pain or pressure in the lower part of your abdomen (tummy)                                                                                         |                                   |                                |                                |                                   |
| h.                                                                                                  | Pain in the lower back                                                                                                                             |                                   |                                |                                |                                   |
| i.                                                                                                  | -Fever with or without chills<br>-If fever, what is the measured body temperature                                                                  | 37.5 <sup>o</sup> Celsius or less | 37.6-37.9 <sup>o</sup> Celsius | 38.0-38.9 <sup>o</sup> Celsius | 39.0 <sup>o</sup> Celsius or more |
| Go to question number 2 if you have any of the symptoms mentioned in question number 1              |                                                                                                                                                    |                                   |                                |                                |                                   |
| 2.                                                                                                  | How bothersome was/were the symptoms for you over the last 24 hours?<br>[Please ✓ one of the below]                                                |                                   |                                |                                |                                   |
| a.                                                                                                  | No discomfort/ No symptoms [0]                                                                                                                     |                                   |                                |                                |                                   |
| b.                                                                                                  | Feeling a little discomfort/ feeling a little worse than usual [1]                                                                                 |                                   |                                |                                |                                   |
| c.                                                                                                  | Feeling moderate discomfort/ feeling quite bad [2]                                                                                                 |                                   |                                |                                |                                   |
| d.                                                                                                  | Feeling extreme discomfort/ feeling extremely bad [3]                                                                                              |                                   |                                |                                |                                   |
| 3.                                                                                                  | Have you received any treatment for any of the symptoms so far?<br>If yes, what treatment have you received?                                       |                                   |                                |                                |                                   |
| 4.                                                                                                  | In this pregnancy, did you experience any of the symptoms before?<br>If yes, have you received any treatment for it, or has it resolved by itself? |                                   |                                |                                |                                   |
| 5.                                                                                                  | Did you ever suffer from a urinary tract infection before this pregnancy?                                                                          |                                   |                                |                                |                                   |
